# Supplementary material for: Solid-phase extraction using hierarchical organosilicates for enhanced detection of nitroenergetic targets
Source: Royal Society of Chemistry journal article supplement (doi:10.1039/c1em10034c), 2011-01-01
Supplement: c1em10034c.pdf [file c1em10034c.pdf]

## Supplementary Data

# Solid-phase extraction using hierarchical organosilicates for enhanced detection of nitroenergetic targets

Brandy J. Johnson<sup>1\*</sup>, Brian J. Melde<sup>1</sup>, Iwona A. Leska<sup>2</sup>, Paul T. Charles<sup>1</sup>, Alan D. Hewitt<sup>3</sup>

<sup>1</sup>Center for Bio/Molecular Science and Engineering, Naval Research Laboratory, Washington, DC; <sup>2</sup>NOVA Research Incorporated, Alexandria, VA; <sup>3</sup>Engineer Research and Development Center, US Army Corps of Engineers, NH

\*brandy.white@nrl.navy.mil, fax: 202 404 8897

The supplementary data supplied here provides materials characterization for the MM1 organosilicate material, Sep-Pak, and LiChrolut EN. Also included are complete results of HPLC analysis for extraction of 2,4,6-trinitrotoluene (TNT), 2,4-dinitrotoluene (DNT), nitroglycerine (NG), 1,3,5-trinitro-1,3,5-triazacyclohexane (RDX), and octahydro-1,3,5,7-tetranitro-1,3,5,7-tetrazocane (HMX) from deionized water, artificial sea water, groundwater, surface water, and soil sample extracts.

**Figure S1.** Characterization of materials. Shown here are the nitrogen sorption isotherms and pore size distributions for each of the three materials: MM1 (circle), Sep-Pak (square; data shifted by +450), and LiChrolut EN (diamond). A table of material characteristics is also provided.

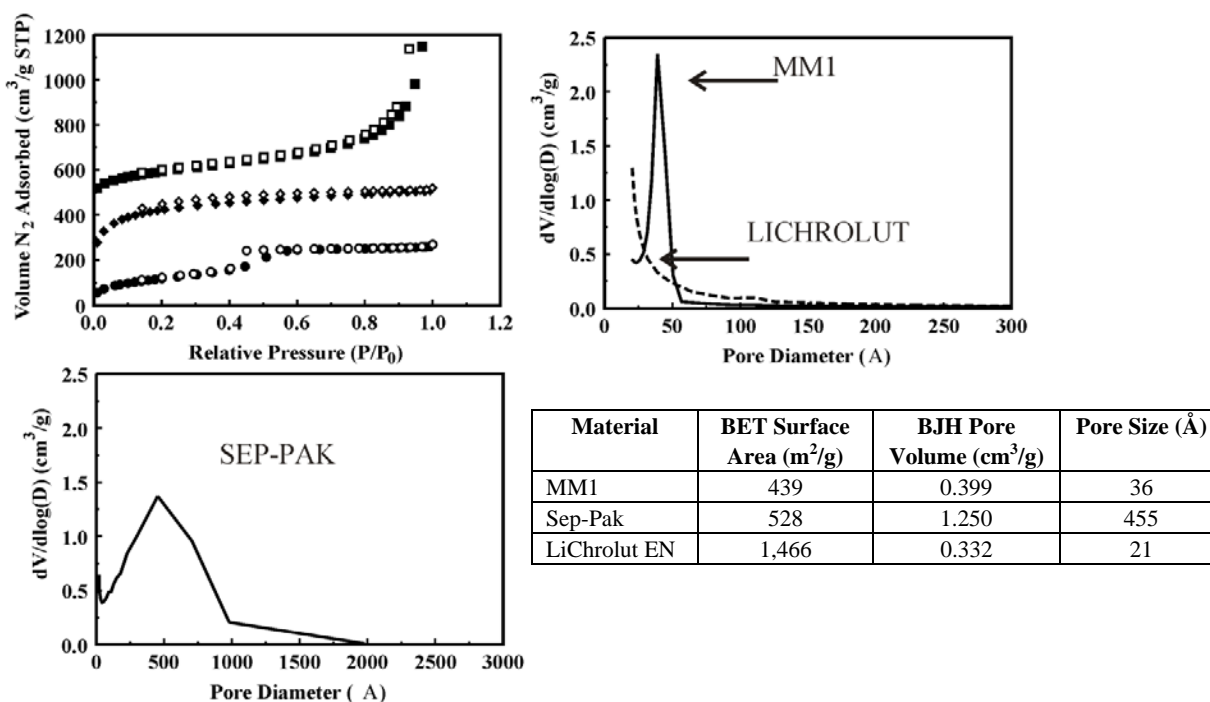



**Table S1. Deionized Water.** Shown here are the results of HPLC analysis of samples containing a single nitroenergetic target at varying concentrations in deionized water. “Flow through” indicates the column effluent during sample exposure (20 mL). “Water rinse” indicates column flush using deionized water (6 mL). “ACN flush” indicates elution of targets using acetonitrile (4 mL). ND (not detected) is used to denote levels below the detection limit for the analytical method. Data is provided as concentrations in parts per billion, in total micrograms recovered, and as a percentage of the total applied target. Three-sigma variations for these experiments are between 7 and 11%.

|                           |               | MM1            |             |             | Sep-Pak        |             |             | LiChrolut EN   |             |             |
|---------------------------|---------------|----------------|-------------|-------------|----------------|-------------|-------------|----------------|-------------|-------------|
|                           |               | [Target] (ppb) | Target (µg) | % recovered | [Target] (ppb) | Target (µg) | % recovered | [Target] (ppb) | Target (µg) | % recovered |
| TNT<br>200 ppb<br>4.0 µg  | Flow through  | ND             | ND          | ND          | <b>38</b>      | <b>0.76</b> | <b>19</b>   | ND             | ND          | ND          |
|                           | Water rinse 1 | ND             | ND          | ND          | ND             | ND          | ND          | ND             | ND          | ND          |
|                           | ACN flush 1   | <b>848</b>     | <b>3.39</b> | <b>85</b>   | <b>706</b>     | <b>2.82</b> | <b>71</b>   | <b>850</b>     | <b>3.40</b> | <b>85</b>   |
|                           | ACN flush 2   | <b>21</b>      | <b>0.08</b> | <b>2</b>    | <b>86</b>      | <b>0.34</b> | <b>9</b>    | <b>126</b>     | <b>0.50</b> | <b>13</b>   |
|                           | Water rinse 2 | ND             | ND          | ND          | ND             | ND          | ND          | ND             | ND          | ND          |
| TNT<br>50 ppb<br>1.0 µg   | Flow through  | ND             | ND          | ND          | ND             | ND          | ND          | ND             | ND          | ND          |
|                           | Water rinse 1 | ND             | ND          | ND          | ND             | ND          | ND          | ND             | ND          | ND          |
|                           | ACN flush 1   | <b>219</b>     | <b>0.87</b> | <b>88</b>   | <b>187</b>     | <b>0.75</b> | <b>75</b>   | <b>245</b>     | <b>0.98</b> | <b>99</b>   |
|                           | ACN flush 2   | ND             | ND          | ND          | <b>27</b>      | <b>0.11</b> | <b>11</b>   | 0              | 0.00        | 0           |
|                           | Water rinse 2 | ND             | ND          | ND          | ND             | ND          | ND          | ND             | ND          | ND          |
| TNT<br>5 ppb<br>0.1 µg    | Flow through  | ND             | ND          | ND          | ND             | ND          | ND          | ND             | ND          | ND          |
|                           | Water rinse 1 | ND             | ND          | ND          | ND             | ND          | ND          | ND             | ND          | ND          |
|                           | ACN flush 1   | <b>24</b>      | <b>0.10</b> | <b>97</b>   | <b>22</b>      | <b>0.09</b> | <b>88</b>   | <b>25</b>      | <b>0.10</b> | <b>101</b>  |
|                           | ACN flush 2   | ND             | ND          | ND          | ND             | ND          | ND          | ND             | ND          | ND          |
|                           | Water rinse 2 | ND             | ND          | ND          | ND             | ND          | ND          | ND             | ND          | ND          |
| TNT<br>0.9 ppb<br>0.02 µg | All volumes   | ND             | ND          | ND          | ND             | ND          | ND          | ND             | ND          | ND          |
|                           |               | MM1            |             |             | Sep-Pak        |             |             | Lichrolut EN   |             |             |
|                           |               | [Target] (ppb) | Target (µg) | % recovered | [Target] (ppb) | Target (µg) | % recovered | [Target] (ppb) | Target (µg) | % recovered |
| RDX<br>198 ppb<br>4.0 µg  | Flow through  | ND             | ND          | ND          | <b>67</b>      | <b>1.33</b> | <b>33</b>   | ND             | ND          | ND          |
|                           | Water rinse 1 | ND             | ND          | ND          | <b>25</b>      | <b>0.15</b> | <b>4</b>    | <b>10</b>      | <b>0.06</b> | <b>1</b>    |
|                           | ACN flush 1   | <b>915</b>     | <b>3.66</b> | <b>92</b>   | <b>590</b>     | <b>2.36</b> | <b>59</b>   | <b>992</b>     | <b>3.97</b> | <b>99</b>   |
|                           | ACN flush 2   | ND             | ND          | ND          | ND             | ND          | ND          | ND             | ND          | ND          |
|                           | Water rinse 2 | ND             | ND          | ND          | ND             | ND          | ND          | ND             | ND          | ND          |
| RDX<br>50 ppb<br>1.0 µg   | Flow through  | ND             | ND          | ND          | <b>28</b>      | <b>0.55</b> | <b>56</b>   | ND             | ND          | ND          |
|                           | Water rinse 1 | ND             | ND          | ND          | <b>22</b>      | <b>0.13</b> | <b>13</b>   | ND             | ND          | ND          |
|                           | ACN flush 1   | <b>237</b>     | <b>0.95</b> | <b>94</b>   | <b>146</b>     | <b>0.59</b> | <b>59</b>   | <b>217</b>     | <b>0.87</b> | <b>88</b>   |
|                           | ACN flush 2   | ND             | ND          | ND          | ND             | ND          | ND          | ND             | ND          | ND          |
|                           | Water rinse 2 | ND             | ND          | ND          | ND             | ND          | ND          | ND             | ND          | ND          |
| RDX<br>5 ppb<br>0.1 µg    | Flow through  | ND             | ND          | ND          | ND             | ND          | ND          | ND             | ND          | ND          |
|                           | Water rinse 1 | ND             | ND          | ND          | ND             | ND          | ND          | ND             | ND          | ND          |
|                           | ACN flush 1   | <b>24</b>      | <b>0.10</b> | <b>96</b>   | ND             | ND          | ND          | ND             | ND          | ND          |
|                           | ACN flush 2   | ND             | ND          | ND          | ND             | ND          | ND          | ND             | ND          | ND          |
|                           | Water rinse 2 | ND             | ND          | ND          | ND             | ND          | ND          | ND             | ND          | ND          |
| RDX<br>0.9 ppb<br>0.02 µg | All volumes   | ND             | ND          | ND          | ND             | ND          | ND          | ND             | ND          | ND          |

**Table S1.** (deionized water continued)

|                           |               | MM1               |                |                | Sep-Pak           |                |                | Lichrolut EN      |                |                |
|---------------------------|---------------|-------------------|----------------|----------------|-------------------|----------------|----------------|-------------------|----------------|----------------|
|                           |               | [Target]<br>(ppb) | Target<br>(µg) | %<br>recovered | [Target]<br>(ppb) | Target<br>(µg) | %<br>recovered | [Target]<br>(ppb) | Target<br>(µg) | %<br>recovered |
| HMX<br>197 ppb<br>3.9 µg  | Flow through  | ND                | ND             | ND             | <b>51</b>         | <b>1.02</b>    | <b>25</b>      | ND                | ND             | ND             |
|                           | Water rinse 1 | ND                | ND             | ND             | ND                | ND             | ND             | ND                | ND             | ND             |
|                           | ACN flush 1   | <b>784</b>        | <b>3.14</b>    | <b>78</b>      | <b>524</b>        | <b>2.10</b>    | <b>52</b>      | <b>529</b>        | <b>2.12</b>    | <b>53</b>      |
|                           | ACN flush 2   | ND                | ND             | ND             | <b>40</b>         | <b>0.16</b>    | <b>4</b>       | <b>112</b>        | <b>0.45</b>    | <b>11</b>      |
|                           | Water rinse 2 | ND                | ND             | ND             | ND                | ND             | ND             | ND                | ND             | ND             |
| HMX<br>53 ppb<br>1.0 µg   | Flow through  | ND                | ND             | ND             | <b>19</b>         | <b>0.37</b>    | <b>37</b>      | ND                | ND             | ND             |
|                           | Water rinse 1 | ND                | ND             | ND             | ND                | ND             | ND             | ND                | ND             | ND             |
|                           | ACN flush 1   | <b>198</b>        | <b>0.79</b>    | <b>79</b>      | <b>110</b>        | <b>0.44</b>    | <b>44</b>      | <b>126</b>        | <b>0.51</b>    | <b>51</b>      |
|                           | ACN flush 2   | ND                | ND             | ND             | <b>19</b>         | <b>0.08</b>    | <b>8</b>       | <b>35</b>         | <b>0.14</b>    | <b>14</b>      |
|                           | Water rinse 2 | ND                | ND             | ND             | ND                | ND             | ND             | ND                | ND             | ND             |
| HMX<br>5 ppb<br>0.1 µg    | Flow through  | ND                | ND             | ND             | ND                | ND             | ND             | ND                | ND             | ND             |
|                           | Water rinse 1 | ND                | ND             | ND             | ND                | ND             | ND             | ND                | ND             | ND             |
|                           | ACN flush 1   | ND                | ND             | ND             | ND                | ND             | ND             | <b>14</b>         | <b>0.06</b>    | <b>56</b>      |
|                           | ACN flush 2   | ND                | ND             | ND             | ND                | ND             | ND             | ND                | ND             | ND             |
|                           | Water rinse 2 | ND                | ND             | ND             | ND                | ND             | ND             | ND                | ND             | ND             |
| HMX<br>0.9 ppb<br>0.02 µg | All volumes   | ND                | ND             | ND             | ND                | ND             | ND             | ND                | ND             | ND             |
|                           |               | MM1               |                |                | Sep-Pak           |                |                | Lichrolut EN      |                |                |
|                           |               | [Target]<br>(ppb) | Target<br>(µg) | %<br>recovered | [Target]<br>(ppb) | Target<br>(µg) | %<br>recovered | [Target]<br>(ppb) | Target<br>(µg) | %<br>recovered |
| DNT<br>200 ppb<br>4.0 µg  | Flow through  | ND                | ND             | ND             | <b>41</b>         | <b>0.81</b>    | <b>20</b>      | ND                | ND             | ND             |
|                           | Water rinse 1 | ND                | ND             | ND             | ND                | ND             | ND             | ND                | ND             | ND             |
|                           | ACN flush 1   | <b>731</b>        | <b>2.92</b>    | <b>91</b>      | <b>733</b>        | <b>2.93</b>    | <b>73</b>      | <b>729</b>        | <b>2.92</b>    | <b>95</b>      |
|                           | ACN flush 2   | ND                | ND             | ND             | <b>139</b>        | <b>0.56</b>    | <b>14</b>      | <b>92</b>         | <b>0.37</b>    | <b>12</b>      |
|                           | Water rinse 2 | ND                | ND             | ND             | ND                | ND             | ND             | ND                | ND             | ND             |
| DNT<br>50 ppb<br>1.0 µg   | Flow through  | ND                | ND             | ND             | ND                | ND             | ND             | ND                | ND             | ND             |
|                           | Water rinse 1 | ND                | ND             | ND             | ND                | ND             | ND             | ND                | ND             | ND             |
|                           | ACN flush 1   | <b>223</b>        | <b>0.89</b>    | <b>89</b>      | <b>171</b>        | <b>0.69</b>    | <b>69</b>      | <b>241</b>        | <b>0.96</b>    | <b>97</b>      |
|                           | ACN flush 2   | ND                | ND             | ND             | <b>58</b>         | <b>0.23</b>    | <b>23</b>      | <b>32</b>         | <b>0.13</b>    | <b>13</b>      |
|                           | Water rinse 2 | ND                | ND             | ND             | ND                | ND             | ND             | ND                | ND             | ND             |
| DNT<br>5 ppb<br>0.1 µg    | Flow through  | ND                | ND             | ND             | ND                | ND             | ND             | ND                | ND             | ND             |
|                           | Water rinse 1 | ND                | ND             | ND             | ND                | ND             | ND             | ND                | ND             | ND             |
|                           | ACN flush 1   | <b>22</b>         | <b>0.09</b>    | <b>90</b>      | <b>16</b>         | <b>0.06</b>    | <b>65</b>      | <b>16</b>         | <b>0.07</b>    | <b>87</b>      |
|                           | ACN flush 2   | ND                | ND             | ND             | ND                | ND             | ND             | ND                | ND             | ND             |
|                           | Water rinse 2 | ND                | ND             | ND             | ND                | ND             | ND             | ND                | ND             | ND             |
| DNT<br>0.9 ppb<br>0.02 µg | All Volumes   | ND                | ND             | ND             | ND                | ND             | ND             | ND                | ND             | ND             |

**Table S1.** (deionized water continued)

|                          |               | MM1            |             |             | Sep-Pak        |             |             | Lichrolut EN   |             |             |
|--------------------------|---------------|----------------|-------------|-------------|----------------|-------------|-------------|----------------|-------------|-------------|
|                          |               | [Target] (ppb) | Target (µg) | % recovered | [Target] (ppb) | Target (µg) | % recovered | [Target] (ppb) | Target (µg) | % recovered |
| NG<br>200 ppb<br>4.0 µg  | Flow through  | ND             | ND          | ND          | <b>4</b>       | <b>0.08</b> | <b>2</b>    | ND             | ND          | ND          |
|                          | Water rinse 1 | ND             | ND          | ND          | ND             | ND          | ND          | ND             | ND          | ND          |
|                          | ACN flush 1   | <b>727</b>     | <b>2.91</b> | <b>87</b>   | <b>589</b>     | <b>2.35</b> | <b>57</b>   | <b>766</b>     | <b>3.06</b> | <b>74</b>   |
|                          | ACN flush 2   | ND             | ND          | ND          | <b>99</b>      | <b>0.40</b> | <b>10</b>   | ND             | ND          | ND          |
|                          | Water rinse 2 | ND             | ND          | ND          | ND             | ND          | ND          | ND             | ND          | ND          |
| NG<br>50 ppb<br>1.0 µg   | Flow through  | ND             | ND          | ND          | ND             | ND          | ND          | ND             | ND          | ND          |
|                          | Water rinse 1 | ND             | ND          | ND          | ND             | ND          | ND          | ND             | ND          | ND          |
|                          | ACN flush 1   | <b>137</b>     | <b>0.55</b> | <b>91</b>   | <b>77</b>      | <b>0.31</b> | <b>51</b>   | <b>227</b>     | <b>0.91</b> | <b>76</b>   |
|                          | ACN flush 2   | ND             | ND          | ND          | ND             | ND          | ND          | ND             | ND          | ND          |
|                          | Water rinse 2 | ND             | ND          | ND          | ND             | ND          | ND          | ND             | ND          | ND          |
| NG<br>5 ppb<br>0.10 µg   | All volumes   | ND             | ND          | ND          | ND             | ND          | ND          | ND             | ND          | ND          |
| NG<br>0.9 ppb<br>0.02 µg | All volumes   | ND             | ND          | ND          | ND             | ND          | ND          | ND             | ND          | ND          |

**Table S2. Artificial Sea Water.** Shown here are the results of HPLC analysis of samples containing a single nitroenergetic target at varying concentrations in artificial sea water. “Flow through” indicates the column effluent during sample exposure (20 mL). “Water rinse” indicates column flush using deionized water (6 mL). “ACN flush” indicates elution of targets using acetonitrile (4 mL). ND (not detected) is used to denote levels below the detection limit for the analytical method. Data is provided as concentrations in parts per billion, in total micrograms recovered, and as a percentage of the total applied target.

|                           |               | MM1            |             |             | Sep-Pak        |             |             | LiChrolut EN   |             |             |
|---------------------------|---------------|----------------|-------------|-------------|----------------|-------------|-------------|----------------|-------------|-------------|
|                           |               | [Target] (ppb) | Target (µg) | % recovered | [Target] (ppb) | Target (µg) | % recovered | [Target] (ppb) | Target (µg) | % recovered |
| TNT<br>200 ppb<br>4.0 µg  | Flow through  | ND             | ND          | ND          | <b>25</b>      | <b>0.50</b> | <b>12</b>   | ND             | ND          | ND          |
|                           | Water rinse 1 | ND             | ND          | ND          | ND             | ND          | ND          | ND             | ND          | ND          |
|                           | ACN flush 1   | <b>897</b>     | <b>3.59</b> | <b>90</b>   | <b>811</b>     | <b>3.24</b> | <b>81</b>   | <b>782</b>     | <b>3.13</b> | <b>78</b>   |
|                           | ACN flush 2   | ND             | ND          | ND          | ND             | ND          | ND          | ND             | ND          | ND          |
|                           | Water rinse 2 | ND             | ND          | ND          | ND             | ND          | ND          | ND             | ND          | ND          |
| TNT<br>50 ppb<br>1.0 µg   | Flow through  | ND             | ND          | ND          | ND             | ND          | ND          | ND             | ND          | ND          |
|                           | Water rinse 1 | ND             | ND          | ND          | ND             | ND          | ND          | ND             | ND          | ND          |
|                           | ACN flush 1   | <b>211</b>     | <b>0.84</b> | <b>84</b>   | <b>207</b>     | <b>0.83</b> | <b>82</b>   | <b>190</b>     | <b>0.76</b> | <b>76</b>   |
|                           | ACN flush 2   | ND             | ND          | ND          | ND             | ND          | ND          | ND             | ND          | ND          |
|                           | Water rinse 2 | ND             | ND          | ND          | ND             | ND          | ND          | ND             | ND          | ND          |
| TNT<br>5 ppb<br>0.1 µg    | Flow through  | ND             | ND          | ND          | ND             | ND          | ND          | ND             | ND          | ND          |
|                           | Water rinse 1 | ND             | ND          | ND          | ND             | ND          | ND          | ND             | ND          | ND          |
|                           | ACN flush 1   | <b>18</b>      | <b>0.07</b> | <b>72</b>   | <b>17</b>      | <b>0.07</b> | <b>68</b>   | <b>23</b>      | <b>0.09</b> | <b>93</b>   |
|                           | ACN flush 2   | ND             | ND          | ND          | ND             | ND          | ND          | ND             | ND          | ND          |
|                           | Water rinse 2 | ND             | ND          | ND          | ND             | ND          | ND          | ND             | ND          | ND          |
| TNT<br>0.9 ppb<br>0.02 µg | All volumes   | ND             | ND          | ND          | ND             | ND          | ND          | ND             | ND          | ND          |

**Table S2.** (sea water continued)

|                           |               | MM1            |             |             | Sep-Pak        |             |             | Lichrolut EN   |             |             |
|---------------------------|---------------|----------------|-------------|-------------|----------------|-------------|-------------|----------------|-------------|-------------|
|                           |               | [Target] (ppb) | Target (µg) | % recovered | [Target] (ppb) | Target (µg) | % recovered | [Target] (ppb) | Target (µg) | % recovered |
| RDX<br>200 ppb<br>4.0 µg  | Flow through  | ND             | ND          | ND          | <b>15</b>      | <b>0.31</b> | <b>8</b>    | ND             | ND          | ND          |
|                           | Water rinse 1 | <b>55</b>      | <b>0.33</b> | <b>8</b>    | ND             | ND          | ND          | ND             | ND          | ND          |
|                           | ACN flush 1   | <b>852</b>     | <b>3.41</b> | <b>85</b>   | <b>729</b>     | <b>2.91</b> | <b>73</b>   | <b>865</b>     | <b>3.46</b> | <b>86</b>   |
|                           | ACN flush 2   | ND             | ND          | ND          | ND             | ND          | ND          | <b>91</b>      | <b>0.37</b> | <b>9</b>    |
|                           | Water rinse 2 | ND             | ND          | ND          | ND             | ND          | ND          | ND             | ND          | ND          |
| RDX<br>50 ppb<br>1.0 µg   | Flow through  | ND             | ND          | ND          | ND             | ND          | ND          | ND             | ND          | ND          |
|                           | Water rinse 1 | ND             | ND          | ND          | ND             | ND          | ND          | ND             | ND          | ND          |
|                           | ACN flush 1   | <b>209</b>     | <b>0.84</b> | <b>84</b>   | <b>157</b>     | <b>0.63</b> | <b>63</b>   | <b>215</b>     | <b>0.86</b> | <b>86</b>   |
|                           | ACN flush 2   | ND             | ND          | ND          | <b>27</b>      | <b>0.11</b> | <b>11</b>   | ND             | ND          | ND          |
|                           | Water rinse 2 | ND             | ND          | ND          | ND             | ND          | ND          | ND             | ND          | ND          |
| RDX<br>5 ppb<br>0.1 mg    | All volumes   | ND             | ND          | ND          | ND             | ND          | ND          | ND             | ND          | ND          |
| RDX<br>0.9 ppb<br>0.02 µg | All volumes   | ND             | ND          | ND          | ND             | ND          | ND          | ND             | ND          | ND          |
|                           |               | MM1            |             |             | Sep-Pak        |             |             | Lichrolut EN   |             |             |
|                           |               | [Target] (ppb) | Target (µg) | % recovered | [Target] (ppb) | Target (µg) | % recovered | [Target] (ppb) | Target (µg) | % recovered |
| HMX<br>200 ppb<br>4.0 µg  | Flow through  | <b>19</b>      | <b>0.39</b> | <b>10</b>   | ND             | ND          | ND          | ND             | ND          | ND          |
|                           | Water rinse 1 | <b>28</b>      | <b>0.17</b> | <b>4</b>    | ND             | ND          | ND          | ND             | ND          | ND          |
|                           | ACN flush 1   | <b>778</b>     | <b>3.11</b> | <b>78</b>   | <b>508</b>     | <b>2.03</b> | <b>51</b>   | <b>558</b>     | <b>2.23</b> | <b>56</b>   |
|                           | ACN flush 2   | ND             | ND          | ND          | ND             | ND          | ND          | <b>53</b>      | <b>0.21</b> | <b>5</b>    |
|                           | Water rinse 2 | ND             | ND          | ND          | ND             | ND          | ND          | ND             | ND          | ND          |
| HMX<br>50 ppb<br>1.0 µg   | Flow through  | ND             | ND          | ND          | ND             | ND          | ND          | ND             | ND          | ND          |
|                           | Water rinse 1 | ND             | ND          | ND          | ND             | ND          | ND          | ND             | ND          | ND          |
|                           | ACN flush 1   | <b>185</b>     | <b>0.74</b> | <b>74</b>   | <b>116</b>     | <b>0.46</b> | <b>47</b>   | <b>142</b>     | <b>0.57</b> | <b>57</b>   |
|                           | ACN flush 2   | ND             | ND          | ND          | ND             | ND          | ND          | <b>19</b>      | <b>0.08</b> | <b>8</b>    |
|                           | Water rinse 2 | ND             | ND          | ND          | ND             | ND          | ND          | ND             | ND          | ND          |
| HMX<br>5 ppb<br>0.1 µg    | Flow through  | ND             | ND          | ND          | ND             | ND          | ND          | ND             | ND          | ND          |
|                           | Water rinse 1 | ND             | ND          | ND          | ND             | ND          | ND          | ND             | ND          | ND          |
|                           | ACN flush 1   | <b>17</b>      | <b>0.07</b> | <b>67</b>   | ND             | ND          | ND          | <b>13</b>      | <b>0.05</b> | <b>52</b>   |
|                           | ACN flush 2   | ND             | ND          | ND          | ND             | ND          | ND          | <b>7</b>       | <b>0.03</b> | <b>30</b>   |
|                           | Water rinse 2 | ND             | ND          | ND          | ND             | ND          | ND          | ND             | ND          | ND          |
| HMX<br>0.9 ppb<br>0.02 µg | All volumes   | ND             | ND          | ND          | ND             | ND          | ND          | ND             | ND          | ND          |

Table S2. (sea water continued)

|                           |               | MM1               |                |                | Sep-Pak           |                |                | Lichrolut EN      |                |                |
|---------------------------|---------------|-------------------|----------------|----------------|-------------------|----------------|----------------|-------------------|----------------|----------------|
|                           |               | [Target]<br>(ppb) | Target<br>(µg) | %<br>recovered | [Target]<br>(ppb) | Target<br>(µg) | %<br>recovered | [Target]<br>(ppb) | Target<br>(µg) | %<br>recovered |
| DNT<br>200 ppb<br>4.0 µg  | Flow through  | ND                | ND             | ND             | <b>41</b>         | <b>0.83</b>    | <b>21</b>      | ND                | ND             | ND             |
|                           | Water rinse 1 | ND                | ND             | ND             | ND                | ND             | ND             | ND                | ND             | ND             |
|                           | ACN flush 1   | <b>946</b>        | <b>3.78</b>    | <b>94</b>      | <b>791</b>        | <b>3.16</b>    | <b>79</b>      | <b>810</b>        | <b>3.24</b>    | <b>81</b>      |
|                           | ACN flush 2   | ND                | ND             | ND             | <b>134</b>        | <b>0.54</b>    | <b>13</b>      | <b>104</b>        | <b>0.41</b>    | <b>10</b>      |
|                           | Water rinse 2 | ND                | ND             | ND             | ND                | ND             | ND             | ND                | ND             | ND             |
| DNT<br>50 ppb<br>1.0 µg   | Flow through  | ND                | ND             | ND             | <b>12</b>         | <b>0.23</b>    | <b>23</b>      | ND                | ND             | ND             |
|                           | Water rinse 1 | ND                | ND             | ND             | ND                | ND             | ND             | ND                | ND             | ND             |
|                           | ACN flush 1   | <b>235</b>        | <b>0.94</b>    | <b>94</b>      | <b>196</b>        | <b>0.78</b>    | <b>78</b>      | <b>171</b>        | <b>0.68</b>    | <b>68</b>      |
|                           | ACN flush 2   | ND                | ND             | ND             | <b>72</b>         | <b>0.29</b>    | <b>29</b>      | ND                | ND             | ND             |
|                           | Water rinse 2 | ND                | ND             | ND             | ND                | ND             | ND             | ND                | ND             | ND             |
| DNT<br>5 ppb<br>0.1 µg    | Flow through  | ND                | ND             | ND             | ND                | ND             | ND             | ND                | ND             | ND             |
|                           | Water rinse 1 | ND                | ND             | ND             | ND                | ND             | ND             | ND                | ND             | ND             |
|                           | ACN flush 1   | <b>20</b>         | <b>0.08</b>    | <b>81</b>      | ND                | ND             | ND             | ND                | ND             | ND             |
|                           | ACN flush 2   | ND                | ND             | ND             | ND                | ND             | ND             | ND                | ND             | ND             |
|                           | Water rinse 2 | ND                | ND             | ND             | ND                | ND             | ND             | ND                | ND             | ND             |
| DNT<br>0.9 ppb<br>0.02 µg | All Volumes   | ND                | ND             | ND             | ND                | ND             | ND             | ND                | ND             | ND             |
|                           |               | MM1               |                |                | Sep-Pak           |                |                | Lichrolut EN      |                |                |
|                           |               | [Target]<br>(ppb) | Target<br>(µg) | %<br>recovered | [Target]<br>(ppb) | Target<br>(µg) | %<br>recovered | [Target]<br>(ppb) | Target<br>(µg) | %<br>recovered |
| NG<br>200 ppb<br>4.0 µg   | Flow through  | ND                | ND             | ND             | ND                | ND             | ND             | ND                | ND             | ND             |
|                           | Water rinse 1 | ND                | ND             | ND             | ND                | ND             | ND             | ND                | ND             | ND             |
|                           | ACN flush 1   | <b>647</b>        | <b>2.59</b>    | <b>63</b>      | <b>422</b>        | <b>1.69</b>    | <b>41</b>      | <b>386</b>        | <b>1.54</b>    | <b>37</b>      |
|                           | ACN flush 2   | <b>98</b>         | <b>0.39</b>    | <b>9</b>       | ND                | ND             | ND             | ND                | ND             | ND             |
|                           | Water rinse 2 | ND                | ND             | ND             | ND                | ND             | ND             | ND                | ND             | ND             |
| NG<br>50 ppb<br>1.0 µg    | Flow through  | ND                | ND             | ND             | ND                | ND             | ND             | ND                | ND             | ND             |
|                           | Water rinse 1 | ND                | ND             | ND             | ND                | ND             | ND             | ND                | ND             | ND             |
|                           | ACN flush 1   | <b>165</b>        | <b>0.66</b>    | <b>66</b>      | <b>81</b>         | <b>0.33</b>    | <b>33</b>      | <b>78</b>         | <b>0.31</b>    | <b>31</b>      |
|                           | ACN flush 2   | ND                | ND             | ND             | ND                | ND             | ND             | ND                | ND             | ND             |
|                           | Water rinse 2 | ND                | ND             | ND             | ND                | ND             | ND             | ND                | ND             | ND             |
| NG<br>5 ppb<br>0.10 µg    | All volumes   | ND                | ND             | ND             | ND                | ND             | ND             | ND                | ND             | ND             |
| NG<br>0.9 ppb<br>0.02 µg  | All volumes   | ND                | ND             | ND             | ND                | ND             | ND             | ND                | ND             | ND             |

**Table S3. Ground Water.** Shown here are the results of HPLC analysis of samples containing a single nitroenergetic target at varying concentrations in ground water. “Flow through” indicates the column effluent during sample exposure (20 mL). “Water rinse” indicates column flush using deionized water (6 mL). “ACN flush” indicates elution of targets using acetonitrile (4 mL). ND (not detected) is used to denote levels below the detection limit for the analytical method. Data is provided as concentrations in parts per billion, in total micrograms recovered, and as a percentage of the total applied target.

|                          |               | MM1            |             |             | Sep-Pak        |             |               | Lichrolut EN   |             |             |
|--------------------------|---------------|----------------|-------------|-------------|----------------|-------------|---------------|----------------|-------------|-------------|
|                          |               | [Target] (ppb) | Target (µg) | % recovered | [Target] (ppb) | Target (µg) | % recovered   | [Target] (ppb) | Target (µg) | % recovered |
| TNT<br>200 ppb<br>4.0 µg | Flow through  | ND             | ND          | ND          | <b>35</b>      | <b>0.70</b> | <b>18</b>     | ND             | ND          | ND          |
|                          | Water rinse 1 | ND             | ND          | ND          | ND             | ND          | ND            | ND             | ND          | ND          |
|                          | ACN flush 1   | <b>873</b>     | <b>3.49</b> | <b>87</b>   | <b>479</b>     | <b>1.92</b> | <b>48</b>     | <b>567</b>     | <b>2.27</b> | <b>57</b>   |
|                          | ACN flush 2   | ND             | ND          | ND          | <b>48</b>      | <b>0.19</b> | <b>5</b>      | <b>22</b>      | <b>0.09</b> | <b>2</b>    |
|                          | Water rinse 2 | ND             | ND          | ND          | ND             | ND          | ND            | ND             | ND          | ND          |
| TNT<br>50 ppb<br>1.0 µg  | Flow through  | ND             | ND          | ND          | <b>18</b>      | <b>0.37</b> | <b>37</b>     | ND             | ND          | ND          |
|                          | Water rinse 1 | ND             | ND          | ND          | ND             | ND          | ND            | ND             | ND          | ND          |
|                          | ACN flush 1   | <b>230</b>     | <b>0.92</b> | <b>92</b>   | <b>114</b>     | <b>0.46</b> | <b>46</b>     | <b>149</b>     | <b>0.59</b> | <b>60</b>   |
|                          | ACN flush 2   | ND             | ND          | ND          | ND             | ND          | ND            | ND             | ND          | ND          |
|                          | Water rinse 2 | ND             | ND          | ND          | ND             | ND          | ND            | ND             | ND          | ND          |
|                          |               | MM1            |             |             | Sep-Pak        |             |               | Lichrolut EN   |             |             |
|                          |               | [Target] (ppb) | Target (µg) | % recovered | [Target] (ppb) | Target (µg) | % recovered   | [Target] (ppb) | Target (µg) | % recovered |
| RDX<br>200 ppb<br>4.0 µg | Flow through  | ND             | ND          | ND          | <b>21</b>      | <b>0.42</b> | <b>10</b>     | ND             | ND          | ND          |
|                          | Water rinse 1 | ND             | ND          | ND          | <b>3</b>       | <b>0.02</b> | <b>&lt; 1</b> | ND             | ND          | ND          |
|                          | ACN flush 1   | <b>924</b>     | <b>3.70</b> | <b>92</b>   | <b>639</b>     | <b>2.55</b> | <b>64</b>     | <b>812</b>     | <b>3.25</b> | <b>81</b>   |
|                          | ACN flush 2   | ND             | ND          | ND          | <b>14</b>      | <b>0.06</b> | <b>1</b>      | <b>30</b>      | <b>0.12</b> | <b>3</b>    |
|                          | Water rinse 2 | ND             | ND          | ND          | ND             | ND          | ND            | ND             | ND          | ND          |
| RDX<br>50 ppb<br>1.0 µg  | Flow through  | ND             | ND          | ND          | ND             | ND          | ND            | ND             | ND          | ND          |
|                          | Water rinse 1 | ND             | ND          | ND          | ND             | ND          | ND            | ND             | ND          | ND          |
|                          | ACN flush 1   | <b>227</b>     | <b>0.91</b> | <b>90</b>   | <b>127</b>     | <b>0.51</b> | <b>50</b>     | <b>179</b>     | <b>0.72</b> | <b>71</b>   |
|                          | ACN flush 2   | ND             | ND          | ND          | ND             | ND          | ND            | <b>10</b>      | <b>0.04</b> | <b>4</b>    |
|                          | Water rinse 2 | ND             | ND          | ND          | ND             | ND          | ND            | ND             | ND          | ND          |
|                          |               | MM1            |             |             | Sep-Pak        |             |               | Lichrolut EN   |             |             |
|                          |               | [Target] (ppb) | Target (µg) | % recovered | [Target] (ppb) | Target (µg) | % recovered   | [Target] (ppb) | Target (µg) | % recovered |
| DNT<br>200 ppb<br>4.0 µg | Flow through  | ND             | ND          | ND          | <b>19</b>      | <b>0.39</b> | <b>10</b>     | ND             | ND          | ND          |
|                          | Water rinse 1 | ND             | ND          | ND          | ND             | ND          | ND            | ND             | ND          | ND          |
|                          | ACN flush 1   | <b>909</b>     | <b>3.64</b> | <b>91</b>   | <b>588</b>     | <b>2.35</b> | <b>59</b>     | <b>716</b>     | <b>2.86</b> | <b>71</b>   |
|                          | ACN flush 2   | ND             | ND          | ND          | <b>149</b>     | <b>0.60</b> | <b>15</b>     | <b>58</b>      | <b>0.23</b> | <b>6</b>    |
|                          | Water rinse 2 | ND             | ND          | ND          | ND             | ND          | ND            | ND             | ND          | ND          |
| DNT<br>49 ppb<br>1.0 µg  | Flow through  | ND             | ND          | ND          | <b>8</b>       | <b>0.17</b> | <b>17</b>     | ND             | ND          | ND          |
|                          | Water rinse 1 | ND             | ND          | ND          | ND             | ND          | ND            | ND             | ND          | ND          |
|                          | ACN flush 1   | <b>219</b>     | <b>0.87</b> | <b>88</b>   | <b>156</b>     | <b>0.62</b> | <b>63</b>     | <b>182</b>     | <b>0.73</b> | <b>73</b>   |
|                          | ACN flush 2   | ND             | ND          | ND          | <b>24</b>      | <b>0.10</b> | <b>10</b>     | <b>18</b>      | <b>0.07</b> | <b>7</b>    |
|                          | Water rinse 2 | ND             | ND          | ND          | ND             | ND          | ND            | ND             | ND          | ND          |



**Table S3. (ground water continued)**

|                          |               | MM1            |             |             | Sep-Pak        |             |             | Lichrolut EN   |             |             |
|--------------------------|---------------|----------------|-------------|-------------|----------------|-------------|-------------|----------------|-------------|-------------|
|                          |               | [Target] (ppb) | Target (µg) | % recovered | [Target] (ppb) | Target (µg) | % recovered | [Target] (ppb) | Target (µg) | % recovered |
| HMX<br>200 ppb<br>4.0 µg | Flow through  | ND             | ND          | ND          | 33             | 0.66        | 17          | ND             | ND          | ND          |
|                          | Water rinse 1 | ND             | ND          | ND          | ND             | ND          | ND          | ND             | ND          | ND          |
|                          | ACN flush 1   | 23             | 0.14        | 3           | 513            | 2.05        | 51          | 411            | 1.64        | 41          |
|                          | ACN flush 2   | 672            | 2.69        | 67          | 66             | 0.26        | 7           | 95             | 0.38        | 9           |
|                          | Water rinse 2 | ND             | ND          | ND          | ND             | ND          | ND          | ND             | ND          | ND          |
| HMX<br>49 ppb<br>1.0 µg  | Flow through  | ND             | ND          | ND          | 20             | 0.41        | 41          | ND             | ND          | ND          |
|                          | Water rinse 1 | ND             | ND          | ND          | ND             | ND          | ND          | ND             | ND          | ND          |
|                          | ACN flush 1   | ND             | ND          | ND          | 92             | 0.37        | 37          | 112            | 0.45        | 44          |
|                          | ACN flush 2   | ND             | ND          | ND          | 18             | 0.07        | 7           | 25             | 0.10        | 10          |
|                          | Water rinse 2 | ND             | ND          | ND          | ND             | ND          | ND          | ND             | ND          | ND          |
|                          |               | MM1            |             |             | Sep-Pak        |             |             | Lichrolut EN   |             |             |
|                          |               | [Target] (ppb) | Target (µg) | % recovered | [Target] (ppb) | Target (µg) | % recovered | [Target] (ppb) | Target (µg) | % recovered |
| NG<br>201 ppb<br>4.0 µg  | Flow through  | ND             | ND          | ND          | ND             | ND          | ND          | ND             | ND          | ND          |
|                          | Water rinse 1 | ND             | ND          | ND          | ND             | ND          | ND          | ND             | ND          | ND          |
|                          | ACN flush 1   | 861            | 3.45        | 86          | 414            | 1.65        | 41          | 514            | 2.06        | 51          |
|                          | ACN flush 2   | ND             | ND          | ND          | ND             | ND          | ND          | ND             | ND          | ND          |
|                          | Water rinse 2 | ND             | ND          | ND          | ND             | ND          | ND          | ND             | ND          | ND          |
| NG<br>48 ppb<br>1.0 µg   | Flow through  | ND             | ND          | ND          | ND             | ND          | ND          | ND             | ND          | ND          |
|                          | Water rinse 1 | ND             | ND          | ND          | ND             | ND          | ND          | ND             | ND          | ND          |
|                          | ACN flush 1   | 186            | 0.74        | 74          | 126            | 0.50        | 50          | 148            | 0.59        | 59          |
|                          | ACN flush 2   | ND             | ND          | ND          | ND             | ND          | ND          | ND             | ND          | ND          |
|                          | Water rinse 2 | ND             | ND          | ND          | ND             | ND          | ND          | ND             | ND          | ND          |

**Table S4. Surface Water.** Shown here are the results of HPLC analysis of samples containing a single nitroenergetic target at varying concentrations in surface water. “Flow through” indicates the column effluent during sample exposure (20 mL). “Water rinse” indicates column flush using deionized water (6 mL). “ACN flush” indicates elution of targets using acetonitrile (4 mL). ND (not detected) is used to denote levels below the detection limit for the analytical method. Data is provided as concentrations in parts per billion, in total micrograms recovered, and as a percentage of the total applied target.

|                          |               | MM1            |             |             | Sep-Pak        |             |             | Lichrolut EN   |             |             |
|--------------------------|---------------|----------------|-------------|-------------|----------------|-------------|-------------|----------------|-------------|-------------|
|                          |               | [Target] (ppb) | Target (µg) | % recovered | [Target] (ppb) | Target (µg) | % recovered | [Target] (ppb) | Target (µg) | % recovered |
| TNT<br>200 ppb<br>4.0 µg | Flow through  | ND             | ND          | ND          | 29             | 0.59        | 15          | ND             | ND          | ND          |
|                          | Water rinse 1 | ND             | ND          | ND          | ND             | ND          | ND          | ND             | ND          | ND          |
|                          | ACN flush 1   | 887            | 3.55        | 89          | 462            | 1.85        | 46          | 520            | 2.08        | 52          |
|                          | ACN flush 2   | ND             | ND          | ND          | 47             | 0.19        | 5           | 29             | 0.12        | 3           |
|                          | Water rinse 2 | ND             | ND          | ND          | ND             | ND          | ND          | ND             | ND          | ND          |
| TNT<br>50 ppb<br>1.0 µg  | Flow through  | ND             | ND          | ND          | 20             | 0.39        | 39          | ND             | ND          | ND          |
|                          | Water rinse 1 | ND             | ND          | ND          | ND             | ND          | ND          | ND             | ND          | ND          |
|                          | ACN flush 1   | 217            | 0.87        | 87          | 157            | 0.63        | 63          | 208            | 0.83        | 83          |
|                          | ACN flush 2   | ND             | ND          | ND          | 26             | 0.10        | 10          | 20             | 0.08        | 8           |
|                          | Water rinse 2 | ND             | ND          | ND          | 19             | 0.12        | 12          | ND             | ND          | ND          |

**Table S4.** (surface water continued)

|                          |               | MM1               |                |                | Sep-Pak           |                |                | Lichrolut EN      |                |                |
|--------------------------|---------------|-------------------|----------------|----------------|-------------------|----------------|----------------|-------------------|----------------|----------------|
|                          |               | [Target]<br>(ppb) | Target<br>(µg) | %<br>recovered | [Target]<br>(ppb) | Target<br>(µg) | %<br>recovered | [Target]<br>(ppb) | Target<br>(µg) | %<br>recovered |
| RDX<br>200 ppb<br>4.0 µg | Flow through  | ND                | ND             | ND             | <b>13</b>         | <b>0.26</b>    | <b>7</b>       | ND                | ND             | ND             |
|                          | Water rinse 1 | ND                | ND             | ND             | ND                | ND             | ND             | ND                | ND             | ND             |
|                          | ACN flush 1   | <b>887</b>        | <b>3.55</b>    | <b>89</b>      | <b>516</b>        | <b>2.06</b>    | <b>52</b>      | <b>819</b>        | <b>3.28</b>    | <b>82</b>      |
|                          | ACN flush 2   | <b>5</b>          | <b>0.02</b>    | <b>1</b>       | <b>65</b>         | <b>0.26</b>    | <b>7</b>       | <b>48</b>         | <b>0.19</b>    | <b>5</b>       |
|                          | Water rinse 2 | ND                | ND             | ND             | ND                | ND             | ND             | ND                | ND             | ND             |
| RDX<br>50 ppb<br>1.0 µg  | Flow through  | ND                | ND             | ND             | <b>11</b>         | <b>0.22</b>    | <b>22</b>      | ND                | ND             | ND             |
|                          | Water rinse 1 | ND                | ND             | ND             | ND                | ND             | ND             | ND                | ND             | ND             |
|                          | ACN flush 1   | <b>210</b>        | <b>0.84</b>    | <b>84</b>      | <b>159</b>        | <b>0.64</b>    | <b>63</b>      | <b>227</b>        | <b>0.91</b>    | <b>90</b>      |
|                          | ACN flush 2   | ND                | ND             | ND             | <b>13</b>         | <b>0.05</b>    | <b>5</b>       | ND                | ND             | ND             |
|                          | Water rinse 2 | ND                | ND             | ND             | ND                | ND             | ND             | ND                | ND             | ND             |
|                          |               | MM1               |                |                | Sep-Pak           |                |                | Lichrolut EN      |                |                |
|                          |               | [Target]<br>(ppb) | Target<br>(µg) | %<br>recovered | [Target]<br>(ppb) | Target<br>(µg) | %<br>recovered | [Target]<br>(ppb) | Target<br>(µg) | %<br>recovered |
| DNT<br>202 ppb<br>4.0 µg | Flow through  | ND                | ND             | ND             | <b>33</b>         | <b>0.66</b>    | <b>17</b>      | ND                | ND             | ND             |
|                          | Water rinse 1 | ND                | ND             | ND             | ND                | ND             | ND             | ND                | ND             | ND             |
|                          | ACN flush 1   | <b>885</b>        | <b>3.54</b>    | <b>89</b>      | <b>715</b>        | <b>2.86</b>    | <b>72</b>      | <b>867</b>        | <b>3.47</b>    | <b>87</b>      |
|                          | ACN flush 2   | <b>13</b>         | <b>0.05</b>    | <b>1</b>       | <b>136</b>        | <b>0.54</b>    | <b>14</b>      | <b>55</b>         | <b>0.22</b>    | <b>5</b>       |
|                          | Water rinse 2 | ND                | ND             | ND             | ND                | ND             | ND             | ND                | ND             | ND             |
| DNT<br>50 ppb<br>1.0 µg  | Flow through  | ND                | ND             | ND             | <b>10</b>         | <b>0.20</b>    | <b>20</b>      | ND                | ND             | ND             |
|                          | Water rinse 1 | ND                | ND             | ND             | ND                | ND             | ND             | ND                | ND             | ND             |
|                          | ACN flush 1   | <b>215</b>        | <b>0.86</b>    | <b>87</b>      | <b>176</b>        | <b>0.70</b>    | <b>71</b>      | <b>222</b>        | <b>0.89</b>    | <b>89</b>      |
|                          | ACN flush 2   | ND                | ND             | ND             | <b>33</b>         | <b>0.13</b>    | <b>13</b>      | <b>21</b>         | <b>0.09</b>    | <b>9</b>       |
|                          | Water rinse 2 | ND                | ND             | ND             | ND                | ND             | ND             | ND                | ND             | ND             |
|                          |               | MM1               |                |                | Sep-Pak           |                |                | Lichrolut EN      |                |                |
|                          |               | [Target]<br>(ppb) | Target<br>(µg) | %<br>recovered | [Target]<br>(ppb) | Target<br>(µg) | %<br>recovered | [Target]<br>(ppb) | Target<br>(µg) | %<br>recovered |
| HMX<br>204 ppb<br>4.1 µg | Flow through  | ND                | ND             | ND             | <b>55</b>         | <b>1.10</b>    | <b>28</b>      | ND                | ND             | ND             |
|                          | Water rinse 1 | ND                | ND             | ND             | ND                | ND             | ND             | ND                | ND             | ND             |
|                          | ACN flush 1   | <b>550</b>        | <b>2.20</b>    | <b>55</b>      | <b>493</b>        | <b>1.97</b>    | <b>49</b>      | <b>613</b>        | <b>2.45</b>    | <b>61</b>      |
|                          | ACN flush 2   | ND                | ND             | ND             | <b>46</b>         | <b>0.18</b>    | <b>5</b>       | <b>77</b>         | <b>0.31</b>    | <b>8</b>       |
|                          | Water rinse 2 | ND                | ND             | ND             | ND                | ND             | ND             | <b>28</b>         | <b>0.17</b>    | <b>4</b>       |
| HMX<br>50 ppb<br>1.0 µg  | Flow through  | ND                | ND             | ND             | <b>37</b>         | <b>0.74</b>    | <b>73</b>      | ND                | ND             | ND             |
|                          | Water rinse 1 | ND                | ND             | ND             | ND                | ND             | ND             | ND                | ND             | ND             |
|                          | ACN flush 1   | <b>127</b>        | <b>0.51</b>    | <b>50</b>      | <b>77</b>         | <b>0.31</b>    | <b>30</b>      | <b>130</b>        | <b>0.52</b>    | <b>51</b>      |
|                          | ACN flush 2   | ND                | ND             | ND             | ND                | ND             | ND             | <b>56</b>         | <b>0.23</b>    | <b>22</b>      |
|                          | Water rinse 2 | ND                | ND             | ND             | ND                | ND             | ND             | ND                | ND             | ND             |
|                          |               | MM1               |                |                | Sep-Pak           |                |                | Lichrolut EN      |                |                |
|                          |               | [Target]<br>(ppb) | Target<br>(µg) | %<br>recovered | [Target]<br>(ppb) | Target<br>(µg) | %<br>recovered | [Target]<br>(ppb) | Target<br>(µg) | %<br>recovered |
| NG<br>198 ppb<br>4.0 µg  | Flow through  | ND                | ND             | ND             | ND                | ND             | ND             | ND                | ND             | ND             |
|                          | Water rinse 1 | ND                | ND             | ND             | ND                | ND             | ND             | ND                | ND             | ND             |
|                          | ACN flush 1   | <b>808</b>        | <b>3.23</b>    | <b>81</b>      | <b>586</b>        | <b>2.34</b>    | <b>59</b>      | <b>597</b>        | <b>2.39</b>    | <b>60</b>      |
|                          | ACN flush 2   | ND                | ND             | ND             | ND                | ND             | ND             | ND                | ND             | ND             |
|                          | Water rinse 2 | ND                | ND             | ND             | ND                | ND             | ND             | ND                | ND             | ND             |
| NG<br>50 ppb<br>1.0 µg   | Flow through  | ND                | ND             | ND             | ND                | ND             | ND             | ND                | ND             | ND             |
|                          | Water rinse 1 | ND                | ND             | ND             | ND                | ND             | ND             | ND                | ND             | ND             |
|                          | ACN flush 1   | <b>212</b>        | <b>0.85</b>    | <b>85</b>      | <b>131</b>        | <b>0.53</b>    | <b>53</b>      | <b>135</b>        | <b>0.54</b>    | <b>54</b>      |

|  |               |    |    |    |    |    |    |    |    |    |
|--|---------------|----|----|----|----|----|----|----|----|----|
|  | ACN flush 2   | ND |
|  | Water rinse 2 | ND |

**Table S5. Varying pH.** Shown here are the results of HPLC analysis of samples of varying pH containing a single nitroenergetic target. “Flow through” indicates the column effluent during sample exposure (20 mL). “Water rinse” indicates column flush using deionized water (6 mL). “ACN flush” indicates elution of targets using acetonitrile (4 mL). ND (not detected) is used to denote levels below the detection limit for the analytical method. Data is provided as concentrations in parts per billion, in total micrograms recovered, and as a percentage of the total applied target.

|                                  |               | MM1            |             |             | Sep-Pak        |             |             | Lichrolut EN   |             |             |
|----------------------------------|---------------|----------------|-------------|-------------|----------------|-------------|-------------|----------------|-------------|-------------|
|                                  |               | [Target] (ppb) | Target (µg) | % recovered | [Target] (ppb) | Target (µg) | % recovered | [Target] (ppb) | Target (µg) | % recovered |
| TNT<br>pH 3<br>200 ppb<br>4.0 µg | Flow through  | ND             | ND          | ND          | 48             | 0.97        | 24          | ND             | ND          | ND          |
|                                  | Water rinse 1 | ND             | ND          | ND          | ND             | ND          | ND          | ND             | ND          | ND          |
|                                  | ACN flush 1   | 773            | 3.09        | 77          | 436            | 1.74        | 44          | 604            | 2.42        | 60          |
|                                  | ACN flush 2   | ND             | ND          | ND          | 98             | 0.39        | 10          | 72             | 0.29        | 7           |
|                                  | Water rinse 2 | ND             | ND          | ND          | ND             | ND          | ND          | ND             | ND          | ND          |
| TNT<br>pH 3<br>50 ppb<br>1.0 µg  | Flow through  | ND             | ND          | ND          | ND             | ND          | ND          | ND             | ND          | ND          |
|                                  | Water rinse 1 | ND             | ND          | ND          | ND             | ND          | ND          | ND             | ND          | ND          |
|                                  | ACN flush 1   | 175            | 0.70        | 70          | 128            | 0.51        | 51          | 140            | 0.56        | 56          |
|                                  | ACN flush 2   | ND             | ND          | ND          | 35             | 0.14        | 14          | 27             | 0.11        | 11          |
|                                  | Water rinse 2 | ND             | ND          | ND          | ND             | ND          | ND          | ND             | ND          | ND          |
| TNT<br>pH 9<br>200 ppb<br>4.0 µg | Flow through  | ND             | ND          | ND          | 50             | 1.00        | 25          | ND             | ND          | ND          |
|                                  | Water rinse 1 | ND             | ND          | ND          | ND             | ND          | ND          | ND             | ND          | ND          |
|                                  | ACN flush 1   | 839            | 3.36        | 84          | 737            | 2.95        | 73          | 684            | 2.74        | 68          |
|                                  | ACN flush 2   | 131            | 0.52        | 13          | 131            | 0.52        | 13          | 81             | 0.33        | 8           |
|                                  | Water rinse 2 | ND             | ND          | ND          | ND             | ND          | ND          | ND             | ND          | ND          |
| TNT<br>pH 9<br>50 ppb<br>1.0 µg  | Flow through  | ND             | ND          | ND          | ND             | ND          | ND          | ND             | ND          | ND          |
|                                  | Water rinse 1 | ND             | ND          | ND          | ND             | ND          | ND          | ND             | ND          | ND          |
|                                  | ACN flush 1   | 214            | 0.86        | 85          | 148            | 0.59        | 59          | 155            | 0.62        | 62          |
|                                  | ACN flush 2   | ND             | ND          | ND          | 32             | 0.13        | 13          | 31             | 0.12        | 12          |
|                                  | Water rinse 2 | ND             | ND          | ND          | ND             | ND          | ND          | ND             | ND          | ND          |
|                                  |               | MM1            |             |             | Sep-Pak        |             |             | Lichrolut EN   |             |             |
|                                  |               | [Target] (ppb) | Target (µg) | % recovered | [Target] (ppb) | Target (µg) | % recovered | [Target] (ppb) | Target (µg) | % recovered |
| RDX<br>pH 3<br>200 ppb<br>4.0 µg | Flow through  | ND             | ND          | ND          | 35             | 0.70        | 18          | ND             | ND          | ND          |
|                                  | Water rinse 1 | 1              | 0.01        | < 1         | ND             | ND          | ND          | ND             | ND          | ND          |
|                                  | ACN flush 1   | 860            | 3.44        | 86          | 580            | 2.32        | 58          | 738            | 2.95        | 74          |
|                                  | ACN flush 2   | ND             | ND          | ND          | 5              | 0.02        | < 1         | 37             | 0.15        | 4           |
|                                  | Water rinse 2 | ND             | ND          | ND          | ND             | ND          | ND          | ND             | ND          | ND          |
| RDX<br>pH 3<br>50 ppb<br>1.0 µg  | Flow through  | ND             | ND          | ND          | 2              | 0.05        | 5           | ND             | ND          | ND          |
|                                  | Water rinse 1 | ND             | ND          | ND          | ND             | ND          | ND          | ND             | ND          | ND          |
|                                  | ACN flush 1   | 212            | 0.85        | 86          | 137            | 0.55        | 55          | 157            | 0.63        | 63          |
|                                  | ACN flush 2   | ND             | ND          | ND          | 8              | 0.03        | 3           | 8              | 0.03        | 3           |
|                                  | Water rinse 2 | ND             | ND          | ND          | ND             | ND          | ND          | ND             | ND          | ND          |
| RDX<br>pH 9<br>200 ppb<br>4.0 µg | Flow through  | ND             | ND          | ND          | 15             | 0.29        | 7           | ND             | ND          | ND          |
|                                  | Water rinse 1 | ND             | ND          | ND          | 3              | 0.02        | < 1         | ND             | ND          | ND          |
|                                  | ACN flush 1   | 969            | 3.87        | 97          | 634            | 2.54        | 64          | 801            | 3.20        | 80          |
|                                  | ACN flush 2   | ND             | ND          | ND          | ND             | ND          | ND          | 18             | 0.07        | 2           |
|                                  | Water rinse 2 | ND             | ND          | ND          | ND             | ND          | ND          | ND             | ND          | ND          |
| RDX<br>pH 9<br>50 ppb<br>1.0 µg  | Flow through  | ND             | ND          | ND          | ND             | ND          | ND          | ND             | ND          | ND          |
|                                  | Water rinse 1 | ND             | ND          | ND          | ND             | ND          | ND          | ND             | ND          | ND          |
|                                  | ACN flush 1   | 237            | 0.95        | 96          | 146            | 0.59        | 59          | 207            | 0.83        | 84          |
|                                  | ACN flush 2   | ND             | ND          | ND          | 13             | 0.05        | 5           | 4              | 0.02        | 2           |
|                                  | Water rinse 2 | ND             | ND          | ND          | ND             | ND          | ND          | ND             | ND          | ND          |



|                                  |               | MM1               |                |                | Sep-Pak           |                |                | Lichrolut EN      |                |                |
|----------------------------------|---------------|-------------------|----------------|----------------|-------------------|----------------|----------------|-------------------|----------------|----------------|
|                                  |               | [Target]<br>(ppb) | Target<br>(µg) | %<br>recovered | [Target]<br>(ppb) | Target<br>(µg) | %<br>recovered | [Target]<br>(ppb) | Target<br>(µg) | %<br>recovered |
| DNT<br>pH 3<br>198 ppb<br>4.0 µg | Flow through  | ND                | ND             | ND             | 35                | 0.70           | 17             | ND                | ND             | ND             |
|                                  | Water rinse 1 | ND                | ND             | ND             | ND                | ND             | ND             | ND                | ND             | ND             |
|                                  | ACN flush 1   | 878               | 3.51           | 88             | 559               | 2.24           | 56             | 659               | 2.64           | 66             |
|                                  | ACN flush 2   | 14                | 0.06           | 1              | 137               | 0.55           | 14             | 71                | 0.29           | 7              |
|                                  | Water rinse 2 | ND                | ND             | ND             | ND                | ND             | ND             | ND                | ND             | ND             |
| DNT<br>pH 3<br>50 ppb<br>1.0 µg  | Flow through  | ND                | ND             | ND             | ND                | ND             | ND             | ND                | ND             | ND             |
|                                  | Water rinse 1 | ND                | ND             | ND             | ND                | ND             | ND             | ND                | ND             | ND             |
|                                  | ACN flush 1   | 217               | 0.87           | 87             | 128               | 0.51           | 51             | 147               | 0.59           | 59             |
|                                  | ACN flush 2   | ND                | ND             | ND             | 29                | 0.11           | 11             | 22                | 0.09           | 9              |
|                                  | Water rinse 2 | ND                | ND             | ND             | ND                | ND             | ND             | ND                | ND             | ND             |
| DNT<br>pH 9<br>198 ppb<br>4.0 µg | Flow through  | ND                | ND             | ND             | 32                | 0.65           | 16             | ND                | ND             | ND             |
|                                  | Water rinse 1 | ND                | ND             | ND             | ND                | ND             | ND             | ND                | ND             | ND             |
|                                  | ACN flush 1   | 913               | 3.65           | 91             | 747               | 2.99           | 74             | 828               | 3.31           | 83             |
|                                  | ACN flush 2   | 16                | 0.07           | 2              | 153               | 0.61           | 15             | 74                | 0.30           | 7              |
|                                  | Water rinse 2 | ND                | ND             | ND             | ND                | ND             | ND             | ND                | ND             | ND             |
| DNT<br>pH 9<br>50 ppb<br>1.0 µg  | Flow through  | ND                | ND             | ND             | ND                | ND             | ND             | ND                | ND             | ND             |
|                                  | Water rinse 1 | ND                | ND             | ND             | ND                | ND             | ND             | ND                | ND             | ND             |
|                                  | ACN flush 1   | 230               | 0.92           | 80             | 185               | 0.74           | 64             | 229               | 0.92           | 80             |
|                                  | ACN flush 2   | ND                | ND             | ND             | 43                | 0.17           | 15             | 27                | 0.11           | 9              |
|                                  | Water rinse 2 | ND                | ND             | ND             | ND                | ND             | ND             | ND                | ND             | ND             |

Table S5. (pH continued)

|                                  |               | MM1               |                |                | Sep-Pak           |                |                | Lichrolut EN      |                |                |
|----------------------------------|---------------|-------------------|----------------|----------------|-------------------|----------------|----------------|-------------------|----------------|----------------|
|                                  |               | [Target]<br>(ppb) | Target<br>(µg) | %<br>recovered | [Target]<br>(ppb) | Target<br>(µg) | %<br>recovered | [Target]<br>(ppb) | Target<br>(µg) | %<br>recovered |
| HMX<br>pH 3<br>200 ppb<br>4.0 µg | Flow through  | ND                | ND             | ND             | 68                | 1.36           | 34             | ND                | ND             | ND             |
|                                  | Water rinse 1 | 17                | 0.10           | 3              | 15                | 0.09           | 2              | ND                | ND             | ND             |
|                                  | ACN flush 1   | 671               | 2.69           | 67             | 512               | 2.05           | 51             | 647               | 2.59           | 65             |
|                                  | ACN flush 2   | ND                | ND             | ND             | 53                | 0.21           | 5              | 103               | 0.41           | 10             |
|                                  | Water rinse 2 | ND                | ND             | ND             | ND                | ND             | ND             | ND                | ND             | ND             |
| HMX<br>pH 3<br>50 ppb<br>1.0 µg  | Flow through  | ND                | ND             | ND             | 16                | 0.31           | 31             | ND                | ND             | ND             |
|                                  | Water rinse 1 | ND                | ND             | ND             | ND                | ND             | ND             | ND                | ND             | ND             |
|                                  | ACN flush 1   | 151               | 0.60           | 61             | 113               | 0.45           | 45             | 104               | 0.42           | 42             |
|                                  | ACN flush 2   | ND                | ND             | ND             | 16                | 0.06           | 6              | 28                | 0.11           | 11             |
|                                  | Water rinse 2 | ND                | ND             | ND             | ND                | ND             | ND             | ND                | ND             | ND             |
| HMX<br>pH 9<br>200 ppb<br>4.0 µg | Flow through  | ND                | ND             | ND             | 69                | 1.37           | 20             | ND                | ND             | ND             |
|                                  | Water rinse 1 | 32                | 0.19           | 3              | ND                | ND             | ND             | ND                | ND             | ND             |
|                                  | ACN flush 1   | 1163              | 4.65           | 69             | 717               | 2.87           | 42             | 966               | 3.86           | 57             |
|                                  | ACN flush 2   | ND                | ND             | ND             | 129               | 0.52           | 8              | 147               | 0.59           | 9              |
|                                  | Water rinse 2 | ND                | ND             | ND             | ND                | ND             | ND             | ND                | ND             | ND             |
| HMX<br>pH 9<br>49 ppb<br>0.98 µg | Flow through  | ND                | ND             | ND             | 19                | 0.39           | 22             | ND                | ND             | ND             |
|                                  | Water rinse 1 | ND                | ND             | ND             | ND                | ND             | ND             | ND                | ND             | ND             |
|                                  | ACN flush 1   | 295               | 1.18           | 68             | 176               | 0.71           | 41             | 255               | 1.02           | 59             |
|                                  | ACN flush 2   | ND                | ND             | ND             | 20                | 0.08           | 5              | 45                | 0.18           | 10             |
|                                  | Water rinse 2 | ND                | ND             | ND             | ND                | ND             | ND             | ND                | ND             | ND             |

**Table S5. (pH continued)**

|                              |               | MM1            |             |             | Sep-Pak        |             |             | Lichrolut EN   |             |             |
|------------------------------|---------------|----------------|-------------|-------------|----------------|-------------|-------------|----------------|-------------|-------------|
|                              |               | [Target] (ppb) | Target (µg) | % recovered | [Target] (ppb) | Target (µg) | % recovered | [Target] (ppb) | Target (µg) | % recovered |
| NG pH 3<br>200 ppb<br>4.0 µg | Flow through  | ND             | ND          | ND          | <b>117</b>     | <b>2.34</b> | <b>58</b>   | ND             | ND          | ND          |
|                              | Water rinse 1 | ND             | ND          | ND          | ND             | ND          | ND          | ND             | ND          | ND          |
|                              | ACN flush 1   | <b>631</b>     | <b>2.52</b> | <b>63</b>   | <b>388</b>     | <b>1.55</b> | <b>39</b>   | <b>394</b>     | <b>1.57</b> | <b>39</b>   |
|                              | ACN flush 2   | ND             | ND          | ND          | ND             | ND          | ND          | ND             | ND          | ND          |
|                              | Water rinse 2 | ND             | ND          | ND          | ND             | ND          | ND          | ND             | ND          | ND          |
| NG pH 3<br>50 ppb<br>1.0 µg  | Flow through  | ND             | ND          | ND          | ND             | ND          | ND          | ND             | ND          | ND          |
|                              | Water rinse 1 | ND             | ND          | ND          | ND             | ND          | ND          | ND             | ND          | ND          |
|                              | ACN flush 1   | <b>138</b>     | <b>0.55</b> | <b>55</b>   | <b>110</b>     | <b>0.44</b> | <b>44</b>   | <b>117</b>     | <b>0.47</b> | <b>47</b>   |
|                              | ACN flush 2   | ND             | ND          | ND          | ND             | ND          | ND          | ND             | ND          | ND          |
|                              | Water rinse 2 | ND             | ND          | ND          | ND             | ND          | ND          | ND             | ND          | ND          |
| NG pH 9<br>200 ppb<br>4.0 µg | Flow through  | ND             | ND          | ND          | ND             | ND          | ND          | ND             | ND          | ND          |
|                              | Water rinse 1 | ND             | ND          | ND          | ND             | ND          | ND          | ND             | ND          | ND          |
|                              | ACN flush 1   | <b>632</b>     | <b>2.53</b> | <b>63</b>   | <b>539</b>     | <b>2.16</b> | <b>54</b>   | <b>562</b>     | <b>2.25</b> | <b>56</b>   |
|                              | ACN flush 2   | ND             | ND          | ND          | ND             | ND          | ND          | ND             | ND          | ND          |
|                              | Water rinse 2 | ND             | ND          | ND          | ND             | ND          | ND          | ND             | ND          | ND          |
| NG pH 9<br>50 ppb<br>1.0 µg  | Flow through  | ND             | ND          | ND          | ND             | ND          | ND          | ND             | ND          | ND          |
|                              | Water rinse 1 | ND             | ND          | ND          | ND             | ND          | ND          | ND             | ND          | ND          |
|                              | ACN flush 1   | <b>163</b>     | <b>0.65</b> | <b>65</b>   | <b>125</b>     | <b>0.50</b> | <b>50</b>   | <b>155</b>     | <b>0.62</b> | <b>62</b>   |
|                              | ACN flush 2   | ND             | ND          | ND          | ND             | ND          | ND          | ND             | ND          | ND          |
|                              | Water rinse 2 | ND             | ND          | ND          | ND             | ND          | ND          | ND             | ND          | ND          |

**Table S6.** Results of analysis of soil samples from sites on Holloman Air Force Base, Alamogordo, NM using EPA Method 8330B provided by Cold Regions Research and Engineering Laboratory, Engineer Research and Development Center, US Army Corps of Engineers. ND is used to denote levels below the detection limit for the analytical method. Concentrations are provided as parts per million under the sample conditions applied in this study.

| Sample Identification and Description |                             |           | Target (ppm) |             |             |     |              |             |             |             |             |
|---------------------------------------|-----------------------------|-----------|--------------|-------------|-------------|-----|--------------|-------------|-------------|-------------|-------------|
|                                       |                             |           | HMX          | RDX         | TNB         | DNB | TNT          | 2-ADN T     | 4-ADN T     | 2,4-DNT     | DNA         |
| HO-001                                | Old 2,000-lb crater         |           | ND           | ND          | <b>0.01</b> | ND  | <b>0.14</b>  | <b>0.03</b> | <b>0.04</b> | <b>0.01</b> | ND          |
| HO-004                                | Old 2,000-lb crater         |           | ND           | <b>0.01</b> | <b>0.03</b> | ND  | <b>0.05</b>  | <b>0.02</b> | <b>0.02</b> | ND          | <b>0.01</b> |
| HO-006                                | Old 500-lb crater           |           | ND           | <b>0.01</b> | ND          | ND  | ND           | <b>0.10</b> | ND          | ND          | ND          |
| HO-018                                | Low order bomb crater       | Hot Grid  | ND           | ND          | <b>0.01</b> | ND  | <b>0.15</b>  | ND          | <b>0.04</b> | ND          | ND          |
| HO-019                                | Low order bomb crater       | Hot Grid  | ND           | ND          | <b>0.01</b> | ND  | <b>0.54</b>  | <b>0.04</b> | <b>0.01</b> | ND          | ND          |
| HO-020                                | Low order bomb crater       | Hot Grid  | ND           | ND          | ND          | ND  | <b>2.02</b>  | <b>0.05</b> | <b>0.04</b> | ND          | ND          |
| HO-022                                | 2,000-lb crater             | Hot Grid  | ND           | <b>0.25</b> | <b>0.03</b> | ND  | <b>12.50</b> | <b>0.11</b> | <b>0.11</b> | ND          | ND          |
| HO-023                                | 2,000-lb crater             | Hot Grid  | ND           | <b>0.04</b> | <b>0.03</b> | ND  | <b>2.60</b>  | <b>0.12</b> | <b>0.09</b> | <b>0.08</b> | ND          |
| HO-024                                | 2,000-lb crater             | Hot Grid  | ND           | <b>0.01</b> | <b>0.01</b> | ND  | <b>2.70</b>  | <b>0.12</b> | <b>0.11</b> | ND          | ND          |
| HO-025                                | No visible low-order debris | Cold Grid | ND           | ND          | <b>0.08</b> | ND  | <b>0.58</b>  | ND          | ND          | ND          | ND          |
| HO-026                                | No visible low-order debris | Cold Grid | <b>0.01</b>  | ND          | <b>0.03</b> | ND  | <b>0.19</b>  | <b>0.06</b> | ND          | ND          | <b>0.01</b> |
| HO-027                                | No visible low-order debris | Cold Grid | ND           | <b>0.02</b> | <b>0.02</b> | ND  | <b>0.08</b>  | <b>0.11</b> | <b>0.03</b> | <b>0.01</b> | ND          |



**Table S7.** Results of analysis of soil samples using MM1 for solid-phase extraction (25 mg sorbent column). Target concentrations are provided for the aqueous extract of the sample (as extracted), the effluent from the column during sample application (effluent), and the concentrated extract from the column (eluate). ND is used to denote levels below the detection limit for the analytical method. Concentrations are provided as parts per million in the respective sample (2 grams soil in 20 mL deionized water).

| Target  | Sample       | HO-001       | HO-004          | HO-006          | HO-018          | HO-019      | HO-020       | HO-022          | HO-023          | HO-024          | HO-025      | HO-026      | HO-027          |
|---------|--------------|--------------|-----------------|-----------------|-----------------|-------------|--------------|-----------------|-----------------|-----------------|-------------|-------------|-----------------|
| 2,4-DNT | As Extracted | <b>0.01</b>  | ND              | ND              | ND              | ND          | ND           | ND              | ND              | ND              | ND          | ND          | ND              |
|         | Effluent     | ND           | ND              | ND              | ND              | ND          | ND           | ND              | ND              | ND              | ND          | ND          | ND              |
|         | Eluate       | <b>0.33</b>  | ND              | ND              | ND              | ND          | <b>0.06</b>  | ND              | <b>&lt;0.01</b> | ND              | ND          | ND          | <b>&lt;0.01</b> |
| 2-ADNT  | As Extracted | <b>0.01</b>  | ND              | ND              | ND              | <b>0.03</b> | <b>0.02</b>  | ND              | ND              | ND              | ND          | ND          | ND              |
|         | Effluent     | ND           | ND              | ND              | ND              | ND          | ND           | ND              | ND              | ND              | ND          | ND          | ND              |
|         | Eluate       | <b>0.29</b>  | <b>0.01</b>     | <b>0.01</b>     | ND              | <b>0.43</b> | <b>0.50</b>  | <b>0.09</b>     | <b>0.08</b>     | <b>0.07</b>     | <b>0.02</b> | <b>0.01</b> | <b>0.01</b>     |
| 4-ADNT  | As Extracted | <b>0.02</b>  | ND              | ND              | <b>&lt;0.01</b> | ND          | ND           | ND              | ND              | ND              | ND          | ND          | ND              |
|         | Effluent     | ND           | ND              | ND              | ND              | ND          | ND           | ND              | ND              | ND              | ND          | ND          | ND              |
|         | Eluate       | <b>0.35</b>  | <b>0.24</b>     | ND              | <b>0.92</b>     | <b>0.50</b> | <b>0.63</b>  | <b>0.09</b>     | <b>0.01</b>     | <b>0.03</b>     | ND          | ND          | ND              |
| DNB     | As Extracted | ND           | ND              | ND              | ND              | ND          | ND           | ND              | ND              | ND              | ND          | ND          | ND              |
|         | Effluent     | ND           | ND              | ND              | ND              | ND          | ND           | ND              | ND              | ND              | ND          | ND          | ND              |
|         | Eluate       | ND           | ND              | ND              | ND              | ND          | ND           | ND              | ND              | ND              | ND          | ND          | ND              |
| HMX     | As Extracted | ND           | ND              | ND              | ND              | ND          | ND           | ND              | ND              | ND              | ND          | ND          | ND              |
|         | Effluent     | ND           | ND              | ND              | ND              | ND          | ND           | ND              | ND              | ND              | ND          | ND          | ND              |
|         | Eluate       | ND           | ND              | ND              | ND              | ND          | ND           | ND              | ND              | ND              | ND          | ND          | ND              |
| RDX     | As Extracted | <b>1.32</b>  | <b>&lt;0.01</b> | <b>&lt;0.01</b> | ND              | ND          | ND           | <b>&lt;0.01</b> | ND              | <b>&lt;0.01</b> | ND          | ND          | <b>&lt;0.01</b> |
|         | Effluent     | <b>0.80</b>  | ND              | ND              | ND              | ND          | ND           | ND              | ND              | ND              | ND          | ND          | ND              |
|         | Eluate       | <b>5.23</b>  | <b>0.07</b>     | <b>0.07</b>     | ND              | ND          | ND           | <b>0.22</b>     | <b>&lt;0.01</b> | <b>&lt;0.01</b> | ND          | ND          | <b>&lt;0.01</b> |
| TNB     | As Extracted | <b>0.48</b>  | ND              | ND              | ND              | ND          | ND           | ND              | ND              | ND              | ND          | ND          | ND              |
|         | Effluent     | <b>0.21</b>  | ND              | ND              | ND              | ND          | ND           | ND              | ND              | ND              | ND          | ND          | ND              |
|         | Eluate       | <b>3.30</b>  | <b>0.01</b>     | ND              | <b>&lt;0.01</b> | <b>0.13</b> | <b>0.10</b>  | <b>&lt;0.01</b> | <b>&lt;0.01</b> | ND              | ND          | ND          | ND              |
| TNT     | As Extracted | <b>6.59</b>  | <b>0.29</b>     | ND              | <b>0.64</b>     | <b>0.59</b> | <b>1.12</b>  | <b>0.71</b>     | <b>0.10</b>     | <b>0.11</b>     | ND          | ND          | ND              |
|         | Effluent     | <b>1.73</b>  | <b>&lt;0.01</b> | ND              | <b>0.04</b>     | ND          | <b>0.02</b>  | <b>0.06</b>     | ND              | ND              | ND          | ND          | ND              |
|         | Eluate       | <b>54.59</b> | <b>2.87</b>     | ND              | <b>6.76</b>     | <b>5.06</b> | <b>11.94</b> | <b>6.69</b>     | <b>1.67</b>     | <b>1.51</b>     | <b>0.10</b> | <b>0.01</b> | <b>&lt;0.01</b> |



**Table S8.** Results of analysis of soil sample HO-022 using MM1, LiChrolut EN and Sep-Pak for solid-phase extraction (200 mg sorbent column). “Flow through” indicates the column effluent during sample exposure (20 mL). “Water rinse” indicates column flush using deionized water (6 mL). “ACN flush” indicates elution of targets using acetonitrile (4 mL). ND (not detected) is used to denote levels below the detection limit for the analytical method. Concentrations are provided as parts per billion in the respective sample.

| Target  | Method 8330B | NRL Extraction Protocol |               | MM1  | LiChrolut | Sep-Pak |
|---------|--------------|-------------------------|---------------|------|-----------|---------|
| 2,4-DNT | ND           | ND                      | Flow through  | ND   | ND        | ND      |
|         |              |                         | Water rinse 1 | ND   | ND        | ND      |
|         |              |                         | ACN flush 1   | ND   | ND        | ND      |
|         |              |                         | ACN flush 2   | ND   | ND        | ND      |
|         |              |                         | Water rinse 2 | ND   | ND        | ND      |
| 2-ADNT  | 110          | 16                      | Flow through  | ND   | ND        | ND      |
|         |              |                         | Water rinse 1 | ND   | ND        | ND      |
|         |              |                         | ACN flush 1   | 84   | 72        | 39      |
|         |              |                         | ACN flush 2   | ND   | ND        | 11      |
|         |              |                         | Water rinse 2 | ND   | ND        | ND      |
| 4-ADNT  | 110          | 68                      | Flow through  | ND   | ND        | ND      |
|         |              |                         | Water rinse 1 | ND   | ND        | ND      |
|         |              |                         | ACN flush 1   | 679  | 689       | 398     |
|         |              |                         | ACN flush 2   | ND   | ND        | 87      |
|         |              |                         | Water rinse 2 | ND   | ND        | 4       |
| DNB     | ND           | ND                      | Flow through  | ND   | ND        | ND      |
|         |              |                         | Water rinse 1 | ND   | ND        | ND      |
|         |              |                         | ACN flush 1   | ND   | ND        | ND      |
|         |              |                         | ACN flush 2   | ND   | ND        | ND      |
|         |              |                         | Water rinse 2 | ND   | ND        | ND      |
| HMX     | ND           | ND                      | Flow through  | ND   | ND        | ND      |
|         |              |                         | Water rinse 1 | ND   | ND        | ND      |
|         |              |                         | ACN flush 1   | ND   | ND        | ND      |
|         |              |                         | ACN flush 2   | ND   | ND        | ND      |
|         |              |                         | Water rinse 2 | ND   | ND        | ND      |
| RDX     | 250          | 27                      | Flow through  | ND   | ND        | 12      |
|         |              |                         | Water rinse 1 | ND   | ND        | ND      |
|         |              |                         | ACN flush 1   | 127  | 36        | 21      |
|         |              |                         | ACN flush 2   | ND   | ND        | 12      |
|         |              |                         | Water rinse 2 | ND   | ND        | ND      |
| TNB     | 30           | 8                       | Flow through  | ND   | ND        | ND      |
|         |              |                         | Water rinse 1 | ND   | ND        | ND      |
|         |              |                         | ACN flush 1   | 17   | ND        | ND      |
|         |              |                         | ACN flush 2   | ND   | ND        | ND      |
|         |              |                         | Water rinse 2 | ND   | ND        | ND      |
| TNT     | 1250         | 386                     | Flow through  | ND   | ND        | 90      |
|         |              |                         | Water rinse 1 | ND   | ND        | 3       |
|         |              |                         | ACN flush 1   | 2950 | 2371      | 1789    |
|         |              |                         | ACN flush 2   | 19   | 443       | 419     |
|         |              |                         | Water rinse 2 | ND   | ND        | ND      |
